# Supplementary material for: Identification and Comparative Analysis of Premature Senescence Leaf Mutants in Rice (Oryza sativa L.)
Source: PubMed Central journal article supplement (PMC5796089; doi:10.3390/ijms19010140), 2018-01-03
Supplement: ijms-19-00140-s001.pdf [file ijms-19-00140-s001.pdf]

**Table S1.** Primers used in this study for qRT-PCR.

| <b>Primers</b>   | <b>Forward primers (5'-3')</b> | <b>Reverse primers (5'-3')</b> |
|------------------|--------------------------------|--------------------------------|
| <i>Ubiquitin</i> | CCCTCCACCTCGTCCTCAG            | AGATAACAACGGAAGCATAAAAGTC      |
| <i>SGR</i>       | AGGGGTGGTACAACAAGCTG           | GTCCTTGCGGAAGATGTAG            |
| <i>RCCR1</i>     | CGCATTTCTCATGGAATTT            | CTTCTCACGCTGTTTGTCCA           |
| <i>Osh36</i>     | AACGCATTTGTGGTTGGCTC           | TCAACTTTGGCCGGTGTCTT           |
| <i>OsI57</i>     | ACCCTAAAGTAAATGAAGTC           | CCTGCTCTTGTCTTGTTA             |
| <i>OsNCED1</i>   | ACCATGAAGTCCATGAGGCT           | TCTCGTAGTCTTGGTCTTGG           |
| <i>OsNCED3</i>   | CAAGTTCGAGTACGGCGAGG           | GACAGGATGTAGCCGTCGTC           |
| <i>OsNCED4</i>   | TCGGGAGGTACGACTTCCAT           | TTGAGGTACGGCTTGGACAC           |
| <i>OsZEP</i>     | GGATGCCATTGAGTTTGGTT           | TGGCTGACTGAAGTCTCTCG           |
| <i>OsABA8ox1</i> | CAAGCCCAACACGTTTCATGC          | TGTACTIONGGTTGCGAGGTGG         |
| <i>OsABA8ox2</i> | CTACTGCTGATGGTGGCTGA           | CCCATGGCCTTTGCTTTAT            |
| <i>OsABA8ox3</i> | AGTACAGCCCATTCCTGTG            | ACGCCTAATCAAACCATTGC           |
| <i>CAO</i>       | TTGGCACAAATGGAGACCC            | GCTGCACTGGACCAGACAC            |
| <i>rbcS</i>      | CCGTGAGAACCACAGATCCC           | ACGTTGTCTGAAGCCGATGAT          |
| <i>rbcL</i>      | ATCGTGCTCGCGGTATCTTT           | ACCAGGTGCATTACCCCAAG           |
| <i>HEMA1</i>     | ACACGCCATCTGTTTGAGGT           | CAAGCCTCCACTGTTTTGCC           |
| <i>psbA</i>      | TGTAGCTGGTGTATTCGGCG           | ATAACCATGAGCGGCCACAA           |
| <i>porA</i>      | ATCACCAAGGGCTACGTCTC           | GAGTTGTTGTTCCAGCTCCA           |
| <i>NPH1a</i>     | CACTTGCAACCAATGCGTGA           | ATCCGGGAGTTCCTTTGCAG           |
| <i>CHLI</i>      | CGGAGTAACCTTGGTGCTGT           | CTTGGCAGCCCTGTTAGTCA           |
| <i>psbS1</i>     | CTGAGCCGAAGCCAAAGTTC           | ATCCCCGTCTCCAGGTTTCAG          |
| <i>CHLH</i>      | TGACTCAGACCCGACAAAGC           | TCCCCTCGTACCACTTAGGG           |
| <i>CHLD</i>      | GGAAAGAGAGGGCATTAG             | CAATACGATCAAGTAAGTGTT          |
| <i>cab2R</i>     | GTTCTCCATGTTCCGGCTTCT          | GACGAAGTTGGTGGCGTAG            |

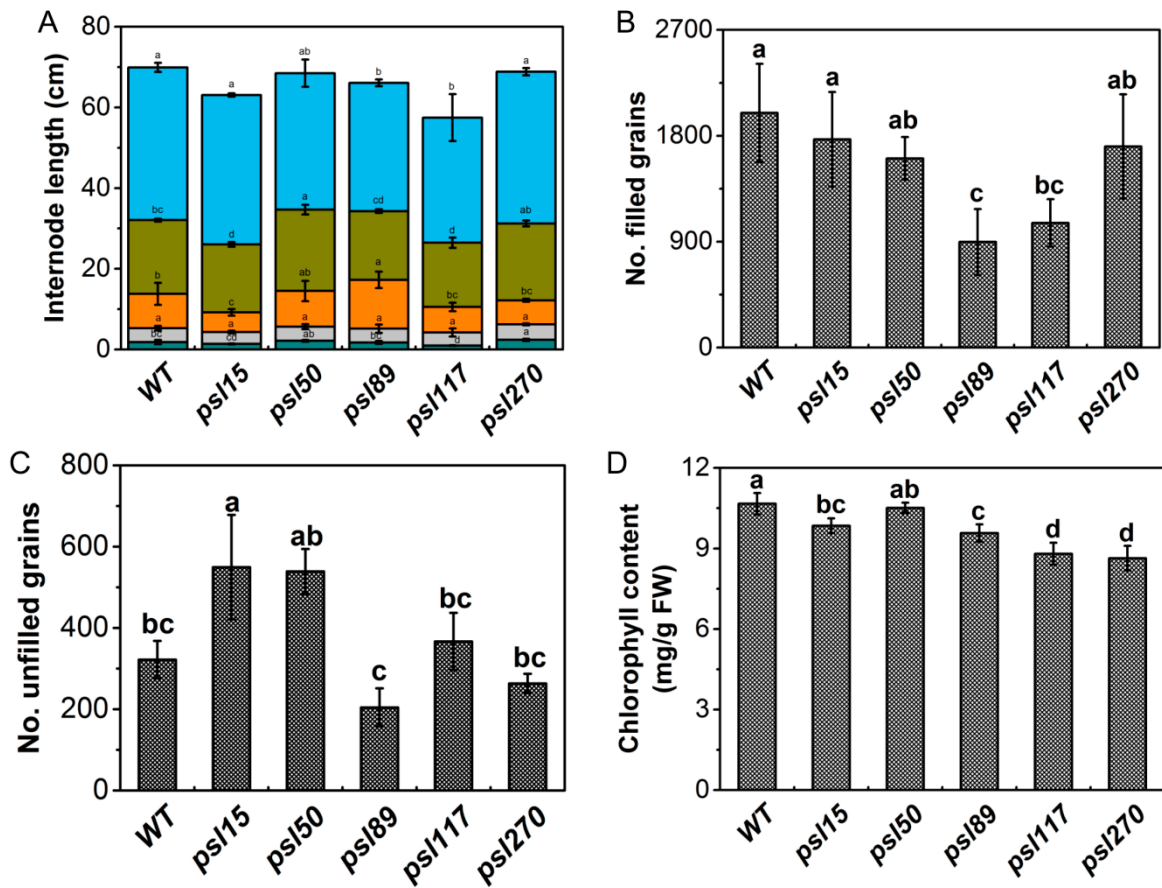

**Figure S1.** Agronomic traits and chlorophyll contents in WT and mutants. (A) internode length of WT and mutants; Columns from bottom to top represent internode I , internode II , internodeIII, internodeIV and internode V , respectively. (B) number of filled grain in WT and mutants. (C) number of unfilled grain in WT and mutants. (D) chlorophyll contents of WT and mutants at the seedling stage. Error bars indicate  $\pm$ SD (n=3). Different letters above the columns indicate a statistical difference at  $P \leq 0.05$  by Duncan's test.

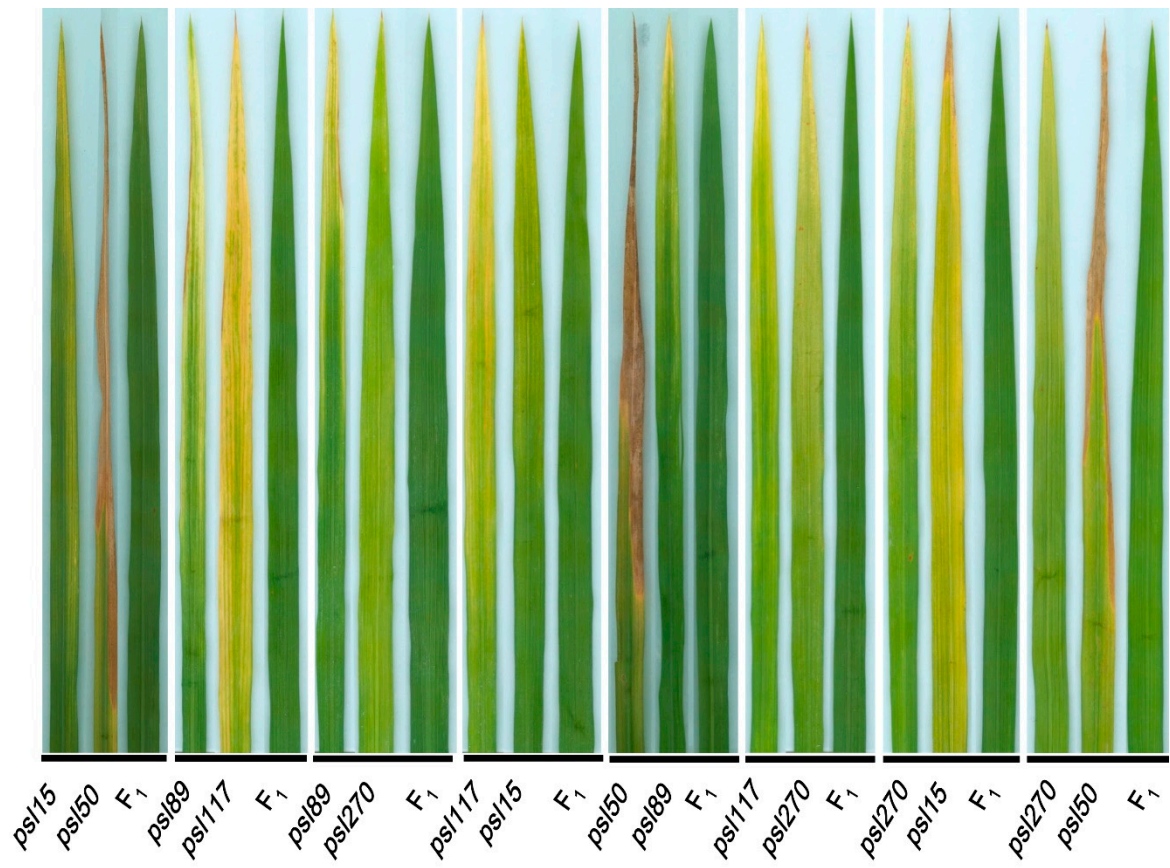

**Figure S2.** Bottom second leaf phenotypes of parental mutant lines and F<sub>1</sub> plants at the tillering stage.
